# Supplementary material for: Green synthesis of porous flower-like palladium with high electrocatalytic activity towards methanol oxidation
Source: Royal Society of Chemistry journal article supplement (doi:10.1039/c3ra40556g), 2013-01-01
Supplement: c3ra40556g.pdf [file c3ra40556g.pdf]

## Supporting Information

# **Green Synthesis of Porous Palladium Nanoflowers with High Catalytic Activities towards Methanol Oxidation**

Ai-Jun Wang,<sup>a,b</sup> Fang-Fang Li,<sup>b</sup> Jie-Ning Zheng,<sup>a</sup> Huan-Xiang Xi,<sup>a</sup> Zi-Yan Meng,<sup>a</sup>  
Jiu-Ju Feng<sup>a,b\*</sup>

<sup>a</sup> *College of Chemistry and Life Science, College of Geography and Environmental Science,  
Zhejiang Normal University, Jinhua, Zhejiang 321004, China*

<sup>b</sup> *School of Chemistry and Chemical Engineering, Henan Normal University, Xinxiang, Henan  
453007, China*

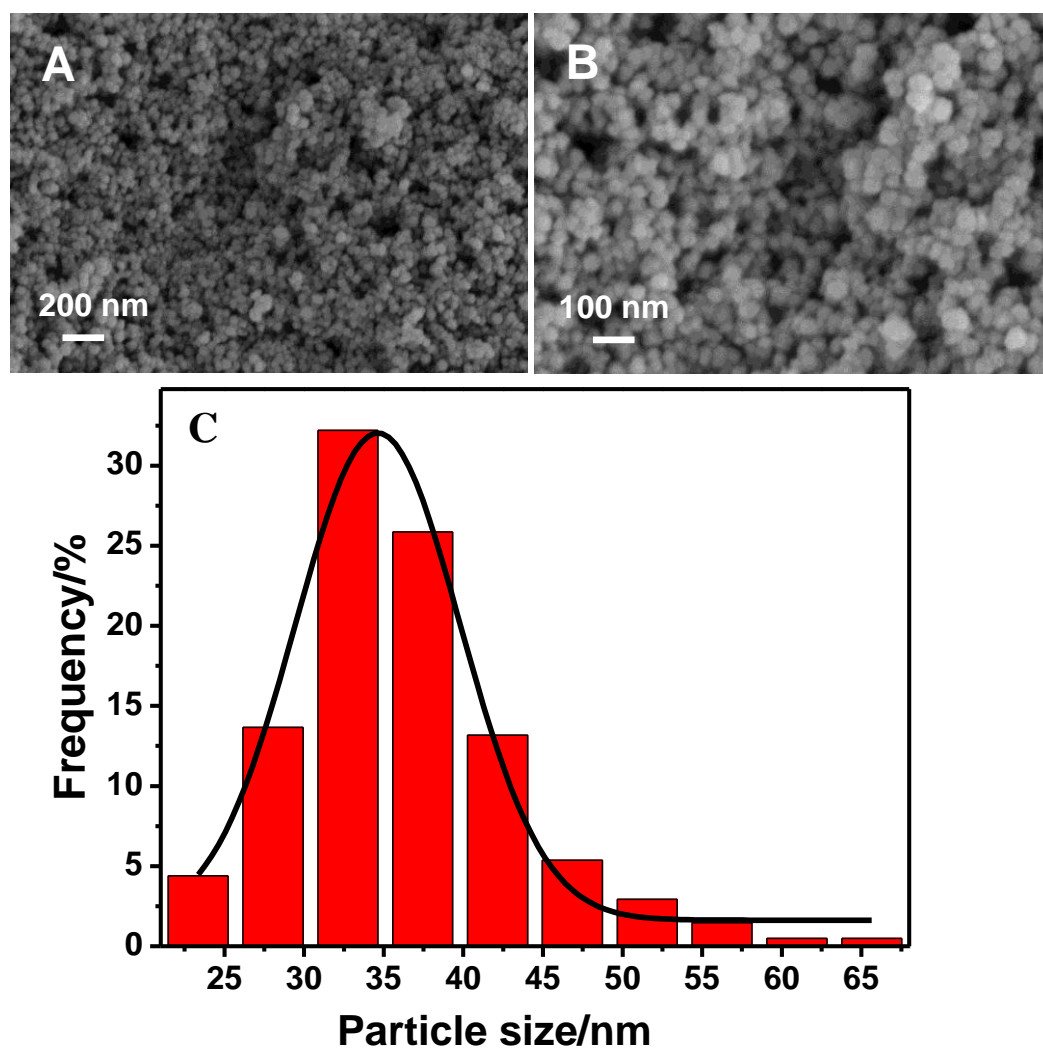

**Figure S1** Low (A) and high (B) magnification of the SEM images, and the size distribution of the Pd nanoflowers (C).

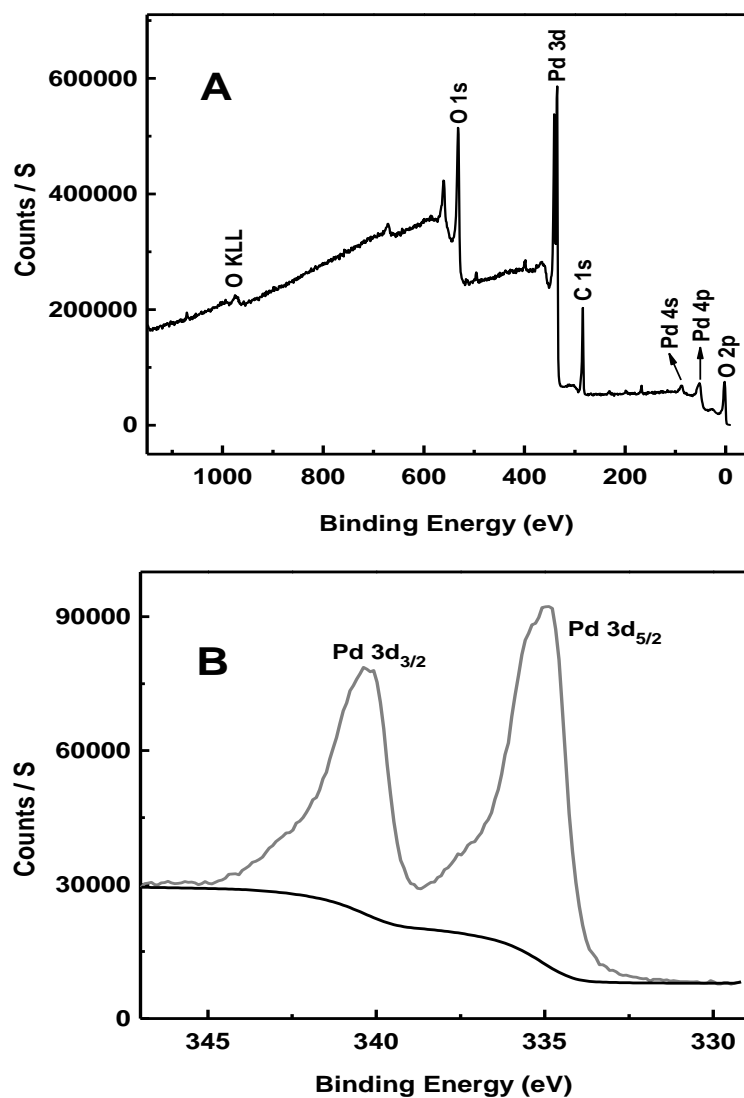

**Figure S2** XPS spectrum of the Pd nanoflowers: full range survey (A) and narrow scan spectra (B) of Pd 3d peaks.

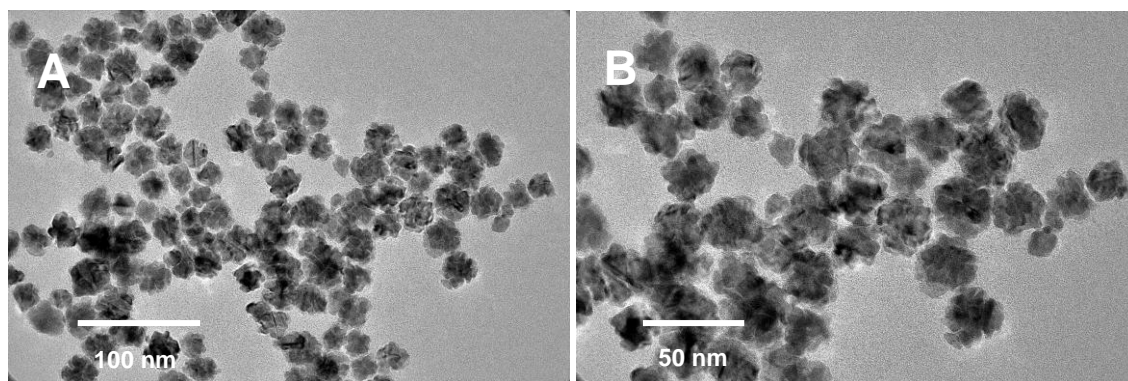

**Figure S3** Low (A) and high (B) magnification TEM images of the Pd products obtained under stirring.
